# Supplementary material for: A family-tailored early motor intervention (EMI-Heart) for infants with complex congenital heart disease: study protocol for a feasibility RCT
Source: PubMed Central journal article supplement (PMC9784271; doi:10.1186/s40814-022-01220-y), 2022-12-23
Supplement: 40814_2022_1220_MOESM1_ESM.pdf [file 40814_2022_1220_MOESM1_ESM.pdf]

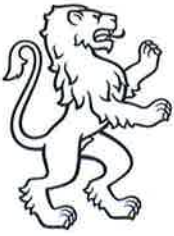

Universitäts-Kinderspital Zürich  
Abteilung Entwicklungspädiatrie  
MScPT Elena Mitteregger  
Steinwiesstrasse 75  
8032 Zürich

15. Februar 2022 / ere

## **Verfügung der Kantonalen Ethikkommission Zürich**

### **Wesentliche Änderung**

|                       |                                                                                                                            |
|-----------------------|----------------------------------------------------------------------------------------------------------------------------|
| <b>Eingereicht am</b> | 03.02.2022 und 04.02.2022                                                                                                  |
| <b>BASEC-Nr.</b>      | 2019-01787                                                                                                                 |
| <b>Projekttitel</b>   | A family centred early intervention programme to improve motor development of infants with severe congenital heart disease |
| <b>Zentrum</b>        | MScPT Elena Mitteregger, Universitäts-Kinderspital Zürich                                                                  |

### **Entscheid**

#### **Die Bewilligung wird erteilt.**

Allfällige weitere Bewilligungspflichten sind zu beachten (siehe Hinweise im Anhang).

### **Entscheidverfahren**

vereinfachtes Verfahren  Präsidialentscheid

Die Ethikkommission bestätigt, dass sie nach ICH-GCP arbeitet.

### **Gebühren**

Betrag: CHF 150.-      Tariffcode: 6.0  
Gemäss der geltenden Gebührenordnung von swissethics.

### Rechtsmittelbelehrung

Gegen diesen Beschluss kann innert 30 Tagen, von der Mitteilung an gerechnet, beim Regierungsrat des Kantons Zürich schriftlich Rekurs eingereicht werden. Die Rekurschrift muss einen Antrag und dessen Begründung enthalten. Der angefochtene Entscheid ist beizulegen oder genau zu bezeichnen. Die angerufenen Beweismittel sind genau zu bezeichnen und soweit möglich beizulegen.

### Kopie an

- Sponsor
- Swissmedic
- Bundesamt für Gesundheit
- beteiligte Ethikkommission
- andere:



Prof. Dr. med. Konrad E. Bloch  
Präsident



Dr. med. Peter Kleist  
Geschäftsführer

Anhang: - Liste der eingereichten Dokumente

## Eingereichte Dokumente für das Hauptzentrum

| <b>MScPT Elena Mitteregger, Universitäts Kinderspital Zürich, Zürich</b>                           |            |         |
|----------------------------------------------------------------------------------------------------|------------|---------|
| Dokument                                                                                           | Dok.Datum  | Version |
| <b>1. Cover Letter</b>                                                                             |            |         |
| emi-coverletter-ethik-20-09-2019.pdf                                                               | 20/12/2019 |         |
| begleitbrief-amendement-emi-heart-16-04-2021.pdf                                                   | 16/04/2021 |         |
| begleitbrief-amendement-emi-heart-03-02-2022.pdf                                                   | 03/02/2022 |         |
| <b>3. Participant information sheet and informed consent (ICF)</b>                                 |            |         |
| emi-parent-information-informed-consent-further-research-use-version-1-3-01-02-2-track-change.docx | 03/02/2022 | 1.3     |
| emi-parent-information-informed-consent-further-research-use-version-1-3-01-02-2-clean.docx        | 03/02/2022 | 1.3     |
| ses-fragebogen-elterninformation-einversta-ndnis-version-1-0-02-02-2022.pdf                        | 02/02/2022 | 1.0     |
| <b>4. Study plan (protocol), signed and dated</b>                                                  |            |         |
| emi-protocol-version-1-3-01-02-2022-track-change.docx                                              | 03/02/2022 | 1.3     |
| emi-protocol-version-1-3-01-02-2022-clean.docx                                                     | 03/02/2022 | 1.3     |
| <b>4a. Monitoring plan</b>                                                                         |            |         |
| emi-monitoring-plan-version-1-1-16-04-2021-trackchange.pdf                                         | 16/04/2021 | 1.1     |
| fzk-monitoringvereinbarung-emi-heart-studie-version-1-0.pdf                                        | 15/03/2021 | 1.0     |
| emi-monitoring-plan-version-1-1-16-04-2021-clean.pdf                                               | 16/04/2021 | 1.1     |
| <b>5. CRF (Case Report Form)</b>                                                                   |            |         |
| emi-casereportforms-version1-0.pdf                                                                 | 16/09/2019 | 1.0     |
| emi-clino-serious-adverse-event-form-version-1-0-07-09-2019.pdf                                    | 07/09/2019 | 1.0     |
| <b>6. Investigator's CV, dated</b>                                                                 |            |         |
| cv-elena-mitteregger-2019.pdf                                                                      | 07/09/2019 |         |
| <b>7. Investigator's proof of GCP training</b>                                                     |            |         |
| gcp-modul-1-2-mitteregger-07-09-2019.pdf                                                           | 07/09/2019 |         |
| gcp-modul-3-mitteregger-07-09-2019.pdf                                                             | 07/09/2019 |         |
| cv-latal19-version-1-0.pdf                                                                         | 20/12/2019 |         |
| nachweis-gcp-latal-version1-0.pdf                                                                  | 20/12/2019 |         |

**10. Insurance**

---

see doc/cat: 4, page/ref: 12

**11. Other documents handed over to study participants**

---

No other documents handed over to study participants

**12. Details on nature and scope/value of compensation for participants**

---

There is no compensation for the participation in this study

**14. Information on secure handling of biological material and personal data, and in particular on the storage thereof**

---

see doc/cat: 7, page/ref: 13

**39. Miscellaneous / Varia**

---

|                                                                       |            |     |
|-----------------------------------------------------------------------|------------|-----|
| emi-tests-and-questionnaires-version-1-3-01-02-2022-track-change.docx | 01/02/2022 | 1.3 |
| emi-feasibility-version-1-0-01-02-22.pdf                              | 01/02/2022 | 1.0 |
| emi-tests-and-questionnaires-version-1-3-01-02-2022-clean.docx        | 01/02/2022 | 1.3 |
| ses-redcap-fragebogen-version-1-0.pdf                                 | 04/02/2022 | 1.0 |

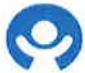

UNIVERSITÄTS-  
**KINDERSPITAL  
ZÜRICH**

*Forschungszentrum  
für das Kind FZK*

Kantonale Ethikkommission Zürich  
Stampfenbachstrasse 121  
8090 Zürich

**Universitäts-Kinderspital Zürich –  
Eleonorenstiftung**

Prof. Dr. med Bea Latal, MPH  
Abteilung für Entwicklungspädiatrie  
Email: [bea.latal@kispi.uzh.ch](mailto:bea.latal@kispi.uzh.ch)  
Tel: +41(0)44 266 7751

Elena Mitteregger, MScPT  
Email: [elena.mitteregger@kispi.uzh.ch](mailto:elena.mitteregger@kispi.uzh.ch)  
Tel: +41(0)44 266 7690

Kinderspital Zürich  
Universitäts-Kinderkliniken  
Steinwiesstrasse 75  
8032 Zürich  
Schweiz

Zürich, 03.02.2022

***A family centred early intervention programme to improve motor development of infants with severe congenital heart disease (BASEC-Nr. 2019-01787)***

Sehr geehrte Damen und Herren

Hiermit sende ich Ihnen eine Liste der beabsichtigten Ergänzungen zum oben genannten «übrigen klinischen Versuch» gemäss Kapitel 4 KlinV.

**Art und Grund der Einreichung:**

(Non-substantial and substantial) Amendement

**Bezug zu bereits eingereichten Unterlagen:**

Dieses Amendement bezieht sich auf den am 07.01.2020 bewilligten «übrigen klinischen Versuch» gemäss Kapitel 4 KlinV mit der BASEC-Nr. **2019-01787** «Family centred intervention for infants with CHD» sowie dessen bewilligten Amendments von 27.04.2021.

**Rechnungsadresse:**

**Prof. Dr. med. Bea Latal MPH**  
Leiterin Abteilung Entwicklungspädiatrie  
Universitäts-  
Kinderspital Zürich  
Abteilung Entwicklungspädiatrie,  
Kreditorenflow  
Elena Mitteregger, MScPT  
Steinwiesstrasse 75  
8032 Zürich

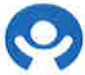

**Anmerkungen zum Amendement:**

Wir erkannten bei Studienbeginn, dass es einfacher ist die Assessments der Kinder im Kinderspital durchzuführen, um ein standardisiertes Testen zu ermöglichen. Es gibt Eltern, die an unserer Elternbefragung teilnehmen wollten, aber nicht aktiv an der Studie teilnehmen möchten. Um eine familienzentrierte Forschung zu gewährleisten, ist zudem die Meinung der Teilnehmenden bedeutsam.

Vor diesem Hintergrund möchten wir die folgenden Neuerungen einreichen:

Die Durchführung der Assessments wurde ins Kinderspital verlegt, da dann für alle Kinder die gleichen Bedingungen gelten und der Ablauf standardisiert werden kann. Es zeigt sich auch, dass dies für Eltern einfacher zu organisieren ist, da sie Termine am Kinderspital kombinieren können. Die Reihenfolge der Interventionstherapien findet in Absprache mit den Eltern abwechselnd im Kinderspital, zu Hause und online mittels Videokonferenzen statt (siehe Protocol, Seite 9, Punkt 2.4 unter b) Intervention Group).

Es gab Eltern, die nicht an unserer Interventionsstudie teilnehmen wollen, sich aber bereit erklären Angaben zu ihrer Lebenssituation zu machen. Das hilft uns Faktoren zu erheben warum Eltern an unserer Interventionsstudie teilnehmen oder nicht.

Da diese Pilotstudie eine Feasibilitystudie ist und als Vorbereitung für eine gross angelegte Studie dient, haben wir beschlossen einen Feasibility Fragebogen zu erstellen und den Eltern der Interventionsgruppe nach Ende der Intervention zuzusenden. Das dient dazu ein differenziertes Feedback von Seiten der Eltern zu erhalten.

- siehe Feasibility Questionnaire: EMI\_Feasibility\_version 1.0 (01.02.22)

Um die Inhalte der Intervention bezüglich der Interaktionen zwischen Therapeutin, Eltern und dem Kind analysieren zu können, werden zudem alle Therapiestunden auf Videos aufgezeichnet. Die Auswertung soll mittels einer qualitativen Analyse zu einem späteren Zeitpunkt erfolgen.

**Liste der veränderten Dokumente:**

- EMI\_Protocol\_version 1.3 (01.02.2022)
- EMI\_Parent Information, Informed Consent, Further Research Use\_version 1.3 (01.02.2022)
- EMI\_Tests and Questionnaires\_version 1.3 (01.02.2022)
- EMI\_Feasibility\_version 1.0 (01.02.22)
- SES Fragebogen\_Elterninformation\_Einverständnis\_version 1.0. (02.02.2022)

Die vorgenommenen Änderungen sind markiert. Anfügen möchten wir, dass durch das Amendement die Testung standardisiert und vereinfacht wird und die Erhebung der Lebenssituation sowie das Feedback der Eltern uns erlaubt Hintergründe an der Studienteilnahme besser zu verstehen. Alle Änderungen verändern den Studienablauf (zeitlich sowie inhaltlich) nicht grundlegend. Bei Fragen oder Unklarheiten stehen wir Ihnen gerne zur Verfügung.

Für die wohlwollende Prüfung der Dokumente danken wir Ihnen bereits im Voraus.

Freundliche Grüsse,

Prof. Dr. med. Bea Latal

Elena Mitteregger, MScPT

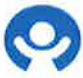

UNIVERSITÄTS-  
**KINDERSPITAL**  
**ZÜRICH**

*Forschungszentrum  
für das Kind FZK*

*Sponsor*

*Principal Investigator*
