# Supplementary material for: A family-tailored early motor intervention (EMI-Heart) for infants with complex congenital heart disease: study protocol for a feasibility RCT
Source: PubMed Central journal article supplement (PMC9784271; doi:10.1186/s40814-022-01220-y), 2022-12-23
Supplement: 40814_2022_1220_MOESM4_ESM.pdf [file 40814_2022_1220_MOESM4_ESM.pdf]

## Trial Registration Data Set

| Data category                                 | Information                                                                                                                                                                                                                                                                                                                                                                                                                                                                                                                                                                                                                                                                                                                                                                                                                                                    |
|-----------------------------------------------|----------------------------------------------------------------------------------------------------------------------------------------------------------------------------------------------------------------------------------------------------------------------------------------------------------------------------------------------------------------------------------------------------------------------------------------------------------------------------------------------------------------------------------------------------------------------------------------------------------------------------------------------------------------------------------------------------------------------------------------------------------------------------------------------------------------------------------------------------------------|
| Primary registry and trial identifying number | Clinicaltrials.gov (NCTT04666857)                                                                                                                                                                                                                                                                                                                                                                                                                                                                                                                                                                                                                                                                                                                                                                                                                              |
| Date of registration in primary registry      | 14.12.2020                                                                                                                                                                                                                                                                                                                                                                                                                                                                                                                                                                                                                                                                                                                                                                                                                                                     |
| Source(s) of monetary or material support     | grant from the Anna Mueller Grocholski Foundation                                                                                                                                                                                                                                                                                                                                                                                                                                                                                                                                                                                                                                                                                                                                                                                                              |
| Trial sponsor                                 | Prof. Dr. med. Beatrice Latal; bea.latal@kispi.uzh.ch<br>Child Development Center, University Children's Hospital<br>Zurich, Switzerland                                                                                                                                                                                                                                                                                                                                                                                                                                                                                                                                                                                                                                                                                                                       |
| Principal investigator                        | Elena Mitteregger, MScPT; elena.mitteregger@kispi.uzh.ch<br>Child Development Center, University Children's Hospital<br>Zurich, Switzerland                                                                                                                                                                                                                                                                                                                                                                                                                                                                                                                                                                                                                                                                                                                    |
| Contact for public & scientific queries       | Elena Mitteregger, MScPT; elena.mitteregger@kispi.uzh.ch                                                                                                                                                                                                                                                                                                                                                                                                                                                                                                                                                                                                                                                                                                                                                                                                       |
| Scientific title                              | A family-tailored early motor intervention (EMI-Heart) for infants with complex congenital heart disease: study protocol for a feasibility RCT                                                                                                                                                                                                                                                                                                                                                                                                                                                                                                                                                                                                                                                                                                                 |
| Country of recruitment                        | Switzerland                                                                                                                                                                                                                                                                                                                                                                                                                                                                                                                                                                                                                                                                                                                                                                                                                                                    |
| Health condition(s) or problem(s) studied     | Motor development of infants with complex congenital heart disease                                                                                                                                                                                                                                                                                                                                                                                                                                                                                                                                                                                                                                                                                                                                                                                             |
| Intervention(s)                               | Intervention group: early motor intervention<br>Control group: standard of care                                                                                                                                                                                                                                                                                                                                                                                                                                                                                                                                                                                                                                                                                                                                                                                |
| Key inclusion and exclusion criteria          | <u>Inclusion criteria:</u><br>(1) infants with CHD, (2) infants born $\geq$ 37 weeks gestational age, (3) infants aged 3–5 months at start of intervention, who underwent open heart surgery with cardiopulmonary bypass once within the first 5 months of life, (4) infants discharged home before the age of 6 months, (5) informed consent of infants' parents documented by signature, and (6) families living within an hour's journey from the Children's Hospital.<br><u>Exclusion criteria:</u><br>(1) infants with univentricular heart defects, (2) infants with syndromes that are often associated with CHD and worse neurodevelopmental outcomes, (3) large cerebral and clinically manifest lesions, (4) infants whose parents have an inadequate understanding of the German language and are thus unable to comprehend the patient information |
| Study type                                    | Interventional study<br>Allocation: randomized controlled<br>Intervention model: parallel assignment<br>Masking: single blinded (outcomes assessors)<br>Primary purpose: feasibility<br>Phase I                                                                                                                                                                                                                                                                                                                                                                                                                                                                                                                                                                                                                                                                |
| Date of first enrolment                       | June 2021                                                                                                                                                                                                                                                                                                                                                                                                                                                                                                                                                                                                                                                                                                                                                                                                                                                      |
| Target sample size                            | 20                                                                                                                                                                                                                                                                                                                                                                                                                                                                                                                                                                                                                                                                                                                                                                                                                                                             |
| Recruitment status                            | Recruiting                                                                                                                                                                                                                                                                                                                                                                                                                                                                                                                                                                                                                                                                                                                                                                                                                                                     |
| Primary Outcome(s)                            | Feasibility                                                                                                                                                                                                                                                                                                                                                                                                                                                                                                                                                                                                                                                                                                                                                                                                                                                    |
| Key secondary outcomes                        | motor development and families' well-being                                                                                                                                                                                                                                                                                                                                                                                                                                                                                                                                                                                                                                                                                                                                                                                                                     |
